1  
Species abundance information improves sequence  
2  
taxonomy classification accuracy

3 Benjamin D. Kaehler<sup>1†</sup>, Nicholas A. Bokulich<sup>2†</sup>, Daniel McDonald<sup>3</sup>, Rob Knight<sup>3,4,5</sup>, J. Gregory  
4 Caporaso<sup>2,6\*</sup>, Gavin A. Huttley<sup>1\*</sup>

5 <sup>1</sup>Research School of Biology, Australian National University, Canberra, Australia

6 <sup>2</sup>The Pathogen and Microbiome Institute, Northern Arizona University, Flagstaff, AZ, USA

7 <sup>3</sup>Department of Pediatrics, University of California San Diego, La Jolla, California, USA

8 <sup>4</sup>Department of Computer Science and Engineering, University of California San Diego, La Jolla,  
9 California, USA

10 <sup>5</sup>Center for Microbiome Innovation, University of California San Diego, La Jolla, California, USA.

11 <sup>6</sup>Department of Biological Sciences, Northern Arizona University, Flagstaff, AZ, USA

12 † These authors contributed equally to this work

13 \* Corresponding authors ([gavin.huttley@anu.edu.au](mailto:gavin.huttley@anu.edu.au) and [gregcaporaso@gmail.com](mailto:gregcaporaso@gmail.com))

14

## Abstract

15 Popular naive Bayes taxonomic classifiers for amplicon sequences assume that all species in  
16 the reference database are equally likely to be observed. We demonstrate that classification  
17 accuracy degrades linearly with the degree to which that assumption is violated, and in practice  
18 it is always violated. By incorporating environment-specific taxonomic abundance information,  
19 we demonstrate that species-level resolution is attainable.

20

## Main

21 Advances in high-throughput DNA sequencing and bioinformatics analyses have illuminated the  
22 crucial roles of microbial communities in human populations and planetary health<sup>1,2</sup> and enable  
23 microbiome meta-analysis on a massive scale<sup>3</sup>. An important step in characterizing microbial  
24 communities is classification of short marker-gene DNA sequences (e.g., bacterial 16S rRNA  
25 genes) to infer taxonomic composition.

26 Short marker-gene sequence reads often contain insufficient information to differentiate species  
27 using conventional methods<sup>4-8</sup>. However, current best practices rely on species-level  
28 classification to circumvent well-documented inconsistencies between genus-level reference  
29 taxonomies and molecular phylogeny (e.g. *Clostridium* and *Eubacterium*)<sup>9</sup>.

30 In this work, we demonstrate that a substantial improvement in classification accuracy of  
31 marker-gene sequences can be achieved if a reference taxonomic distribution for the sample's  
32 source environment is known. This technique enables marker-gene sequencing to differentiate  
33 individual species at a level of accuracy previously only available at genus level.

34 We focus on q2-feature-classifier, a QIIME 2<sup>10</sup> plugin for taxonomic classification. In previous  
35 work<sup>4</sup> we benchmarked this method against other common classifiers, including RDP Classifier<sup>11</sup>  
36 and several consensus-based methods using real and simulated data for four bacterial and  
37 fungal loci. In general, q2-feature-classifier met or exceeded the accuracy of the other classifiers  
38 <sup>4</sup>. However, all tested methods performed similarly if their parameters were tuned in a  
39 concordant manner. Significant performance enhancement demonstrated in the current work for  
40 q2-feature-classifier therefore implies improved performance over those other methods.

41 RDP Classifier and q2-feature-classifier use similar naive Bayes machine-learning classifiers to  
42 assign taxonomies based on sequence k-mer frequencies, and exhibit very similar performance  
43 when default parameters are used<sup>4</sup>. The default assumption of these classifiers is that each  
44 species in the reference taxonomy is equally likely to be observed. Unlike RDP classifier,  
45 however, q2-feature-classifier now allows prior probabilities to be set for each species. We refer  
46 to the prior probabilities as *taxonomic weights* and the default equal probabilities as *uniform*  
47 weights. We hypothesized that inputting the frequencies with which each taxon is actually  
48 observed in nature as taxonomic weights would improve classifier performance.

49 Taxonomic weights were downloaded and assembled using our new utility, q2-clawback  
50 (<https://github.com/BenKaehler/q2-clawback>). We created weights for 14 Earth Microbiome  
51 Project Ontology (EMPO) 3 habitat types<sup>1</sup> across 21,513 samples from the Qiita microbial study  
52 management platform<sup>3</sup> (see Online Methods for details). q2-clawback can assemble weights  
53 from any appropriately curated set of samples or by querying Qiita on any available metadata  
54 category. We refer to EMPO 3 habitat-specific taxonomic weights as *bespoke* weights.

55 Using bespoke weights, researchers can now classify sequences at species level with the same  
56 confidence that they previously classified sequences at genus level (Figure 1). The mean error  
57 rate (the proportion of reads incorrectly classified) across the 14 EMPO 3 habitat types was 14%  
58 ( $\pm 1\%$  s.e.) for bespoke weights at species level and 16% ( $\pm 1\%$  s.e.) for uniform weights at  
59 genus level (single-sided paired t-test  $P = 0.14$ ). These results indicate that bespoke weights  
60 achieve comparable or better species-level accuracy to what uniform weights can only  
61 accomplish at genus level. (As described below, bespoke weights significantly outperform  
62 uniform weights by all metrics when both are compared at species level.) The mean Bray-Curtis  
63 dissimilarity between observed and expected taxonomic abundances was 0.13 ( $\pm 0.01$  s.e.) for  
64 bespoke weights at species level and 0.15 ( $\pm 0.01$  s.e.) for uniform weights at genus level  
65 (single-sided paired t-test  $P = 0.013$ ) (Table S2, Figure S2), indicating better performance of  
66 bespoke weights. See Supplementary Results for more details of our benchmarking results, and  
67 Online Methods for details.

68 Bespoke weights significantly outperformed uniform weights when both were compared at  
69 species level (bespoke error rate = 14%, uniform error rate = 25%, paired t-test  $P = 5.8 \times 10^{-5}$ )  
70 (Figure 1). Similar results were obtained for Bray-Curtis dissimilarity and F-measure (see  
71 Supplementary Results). Averaged across the 14 EMPO 3 habitats, Proteobacteria and  
72 Firmicutes were the most abundant phyla (34% and 18% of reads, respectively). Switching from  
73 uniform to bespoke weights caused error rates for classification of species in these phyla to drop  
74 from 35.4% ( $\pm 0.7\%$  s.e.) to 22.3% ( $\pm 0.4\%$  s.e.) and 43.6% ( $\pm 0.7\%$  s.e.) to 24.3% ( $\pm 0.3\%$  s.e.)  
75 respectively (Figure S8). These differences were highly significant for both Proteobacteria and  
76 Firmicutes (paired t-tests  $P = 1.4 \times 10^{-6}$  and  $P = 8.4 \times 10^{-6}$  respectively).

77 Classifier performance was sensitive to the choice of taxonomic weights. Testing the use of  
78 taxonomic weights from EMPO 3 habitats that were not the sample's true habitat revealed that  
79 as the taxonomic weights moved away from the bespoke weights for a given sample, error rate  
80 increased, as expected (Pearson  $r^2 = 0.57$ ,  $P < 2.2 \times 10^{-16}$ ) (Figure S5; see Supplementary  
81 Results and Online Methods). We also tested the classification accuracy when using the  
82 average of the 14 EMPO 3 habitat-specific bespoke weights, which we term *average* weights.  
83 For every EMPO 3 habitat, bespoke weights outperformed average weights (sign test  $P =$   
84  $6.1 \times 10^{-5}$ ) (Figures 2, S2-3). Similarly, average weights always outperformed uniform weights  
85 (sign test  $P = 6.1 \times 10^{-5}$ ) (Figures 2, S2-3). The implication is that classification accuracy improves  
86 when taxonomic weights more closely resemble taxonomic frequencies observed in nature.  
87 Importantly, uniform weights gave inferior performance, even compared to using taxonomic  
88 weights from the EMPO 3 habitats other than the sample's source habitat (*cross-habitat*  
89 weights; Figure S4; see Supplementary Results).

90 The ability of uniform-weight classifiers to resolve species-level differences from marker genes  
91 is directly related to the sequence topology of reference species. Species with highly similar  
92 sequences will be difficult to differentiate, even if these species occupy exclusive ecological  
93 habitats. However, bespoke weights incorporate habitat-specific species distribution information  
94 to guide sequence classification. Hence, classification accuracy under bespoke weights for a  
95 given habitat type is tied to the sequence topology and distribution of individual species in that  
96 habitat. We devised a statistic that we term the *confusion index* to quantify how often similar  
97 sequences originated from different species in the same habitat (see Online Methods). The  
98 confusion index is a function of the taxonomic difference between sequences with similar k-mer

99 profiles and the frequency that they appear, taking the bespoke weights as the likelihood of  
100 observing a given species. We found that error rates for bespoke weights were correlated with  
101 the confusion index (Figure S7; Pearson  $r^2 = 0.72$ ,  $P = 1.4 \times 10^{-4}$ , see Online Methods and  
102 Supplementary Results). That is, classification accuracy is affected by how often different  
103 species in the same sample have similar amplicon sequences but different taxonomic  
104 classifications, and that varies between EMPO 3 habitats.

105 The assumption of uniform weights, that species are evenly distributed in nature and hence  
106 equally likely to be detected, is incorrect. We have demonstrated that this assumption imposes a  
107 consistently negative impact on performance, even when compared to deliberately incorrect  
108 taxonomic weights selected from ecologically dissimilar environmental sources (the  
109 cross-habitat weights). As a result, we suggest the continued usage of uniform weights is not  
110 justifiable. When publicly accessible pre-existing microbiome data is available for the sample  
111 (i.e., environment) type being investigated, bespoke weights should be used. For all other  
112 natural sample types, *average* weights estimated from global microbial species distributions are  
113 superior to uniform weights. For highly unusual sample distributions, e.g., in synthetic  
114 populations, we recommend compiling custom bespoke weights from existing samples. In the  
115 Supplementary Results we demonstrate how shotgun metagenome data may be used to  
116 improve classification accuracy (Figure S9). Efforts to curate microbiome data and the continued  
117 contribution of researchers to online microbiome data repositories will refine and extend the  
118 ability to apply appropriate bespoke weights for sequence classification in diverse sample types.

119 By comparing uniform, average, and bespoke weights, we have shown that the more specific  
120 the taxonomic weights to a sample's environment, the better the classification accuracy.

121 q2-clawback facilitates achieving these improvements in accuracy by making it easier for the  
122 researcher to assemble weights that are more specific than identifying a sample's EMPO 3  
123 habitat. For instance, it is trivial to assemble weights for all stool samples with human hosts from  
124 Qiita (See the online tutorial, <https://library.qiime2.org/plugins/q2-clawback>).

125 The results we present provide a general path for delivering species-level classification  
126 accuracy. As such, the work provides a complementary solution to the small number of existing  
127 specialist classification databases<sup>12-15</sup>. Moreover, bespoke weight classification permits the  
128 detection of unexpected species not encompassed by custom databases.

129 By improving species-level classification of marker-gene sequences, bespoke weights may  
130 support critical functional inferences, e.g., differentiation of pathogenic and non-pathogenic  
131 species of the same genus<sup>16-21</sup>. Ongoing improvements in public reference sequence and  
132 sample databases will further boost performance, supporting biological insight into global  
133 microbiome compositions. Uniform weights should always be avoided, as they distort natural  
134 species distributions, leading to imprecise and incorrect taxonomic predictions.

135

## Methods

136 Methods, including statements of data availability and any associated accession codes and  
137 references, are available in the online version of the paper.

138

## Acknowledgments

139 QIIME 2 development was primarily funded by NSF Awards 1565100 to JGC and 1565057 to  
140 RK. This work was supported by an NHMRC project grant APP1085372, awarded to GAH, JGC,  
141 RK.

142

## Author Contributions

143 Conceived, designed, and performed experiments: BDK and NAB. Designed and wrote  
144 clawback software: BDK and NAB. Wrote manuscript: BDK, NAB, JGC, GAH. Developed  
145 supporting software (redbiom): DM, RK. Provided critical review of manuscript and results: DM,  
146 RK, JGC, GAH.

147

## Competing Interests

148 The authors declare no competing interests.

149

## References

- 150 1. Thompson, L. R. *et al.* en. *Nature* **551**, 457–463 (2017).
- 151 2. Huttenhower, C. *et al.* *Nature* **486**, 207 (2012).
- 152 3. Gonzalez, A. *et al.* *Nat. Methods* **15**, 796–798 (2018).
- 153 4. Bokulich, N. A. *et al.* en. *Microbiome* **6**, 90 (2018).
- 154 5. Cole, J., Konstantinidis, K, Farris, R. & Tiedje, J. *Liu WT, Jansson JK (ed.)* **515**, 1–19  
155 (2010).
- 156 6. Janda, J. M. & Abbott, S. L. en. *J. Clin. Microbiol.* **45**, 2761–2764 (2007).



- 157 7. Jovel, J. *et al. Front. Microbiol.* **7** (2016).
- 158 8. Edgar, R. C. en. *PeerJ* **6**, e4652 (2018).
- 159 9. Goodrich, J. K. *et al. Cell* **158**, 250–262 (2014).
- 160 10. Bolyen, E. *et al. PeerJ Prepr.* 10.7287/peerj.preprints.27295v2 (2018).
- 161 11. Wang, Q., Garrity, G. M., Tiedje, J. M. & Cole, J. R. en. *Appl. Environ. Microbiol.* **73**,
- 162 5261–5267 (2007).
- 163 12. Rohwer, R. R., Hamilton, J. J., Newton, R. J. & McMahon, K. D. *mSphere* **3**, e00327–18
- 164 (2018).
- 165 13. Tang, J., Iliev, I. D., Brown, J., Underhill, D. M. & Funari, V. A. *J. Immunol. Methods* **421**,
- 166 112–121 (2015).
- 167 14. Ritari, J., Salojärvi, J., Lahti, L. & de Vos, W. M. *BMC Genomics* **16**, 1056 (2015).
- 168 15. Fettweis, J. M. *et al. BMC Genomics* **13**, S17 (2012).
- 169 16. Hain, T., Steinweg, C. & Chakraborty, T. *J. Biotech.* **126**, 37–51 (2006).
- 170 17. Fuchs, T. M., Eisenreich, W., Heesemann, J. & Goebel, W. *FEMS Microbiol. Rev.* **36**,
- 171 435–462 (2012).
- 172 18. Thompson, F. L., Iida, T. & Swings, J. *Microbiol. Mol. Biol. Rev.* **68**, 403–431 (2004).
- 173 19. Fotedar, R *et al. Clin. Microbiol. Rev.* **20**, 511–532 (2007).
- 174 20. Oliveira, A. *et al. Front. Microbiol.* **8**, 1937 (2017).
- 175 21. Fouts, D. E. *et al. PLoS Negl. Trop. Dis.* **10**, e0004403 (2016).

176

## Figures

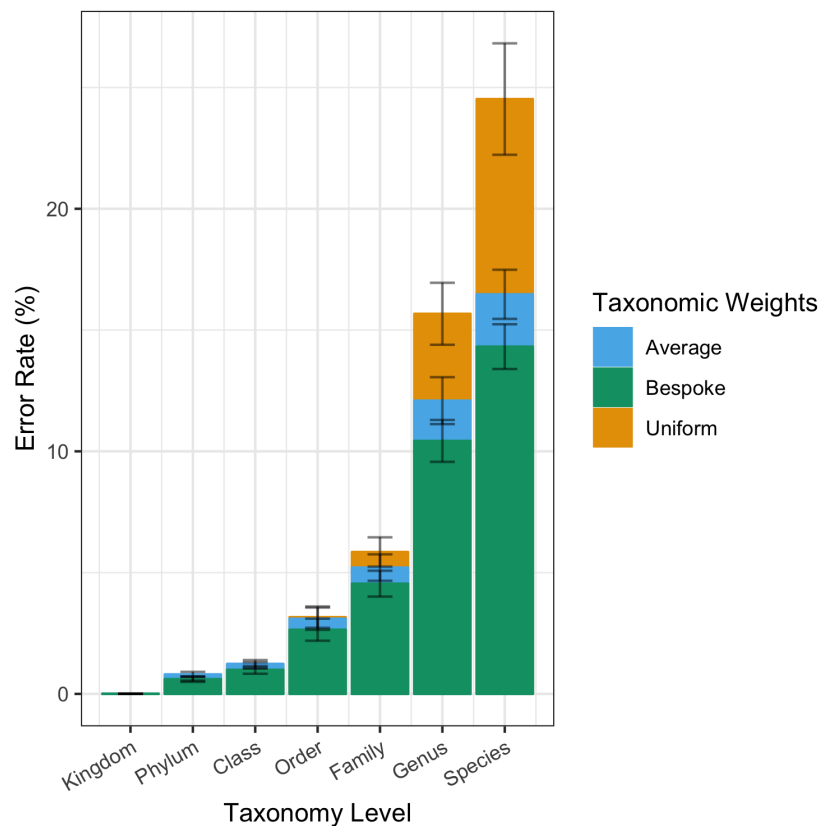

177 **Figure 1.** Using habitat-specific taxonomic weights, researchers can now classify sequences at  
178 species level with the same confidence that they previously classified sequences at genus level  
179 (single-sided paired t-test, species bespoke vs genus uniform,  $t = 1.6$ ,  $P = 0.14$ ). Overlaid  
180 columns show average proportion of incorrectly classified reads for three taxonomic weighting  
181 strategies at each taxonomic level. Bespoke weights were habitat-specific. Average weights  
182 were averaged across the 14 EMPO 3 habitats. Uniform weights are the current best practice.  
183 Cross validation tests for each of 14 EMPO 3 habitats were averaged to calculated error rates.  
184 21,513 empirical taxonomic abundances contributed to the results. Error bars show standard  
185 errors across EMPO 3 habitats.

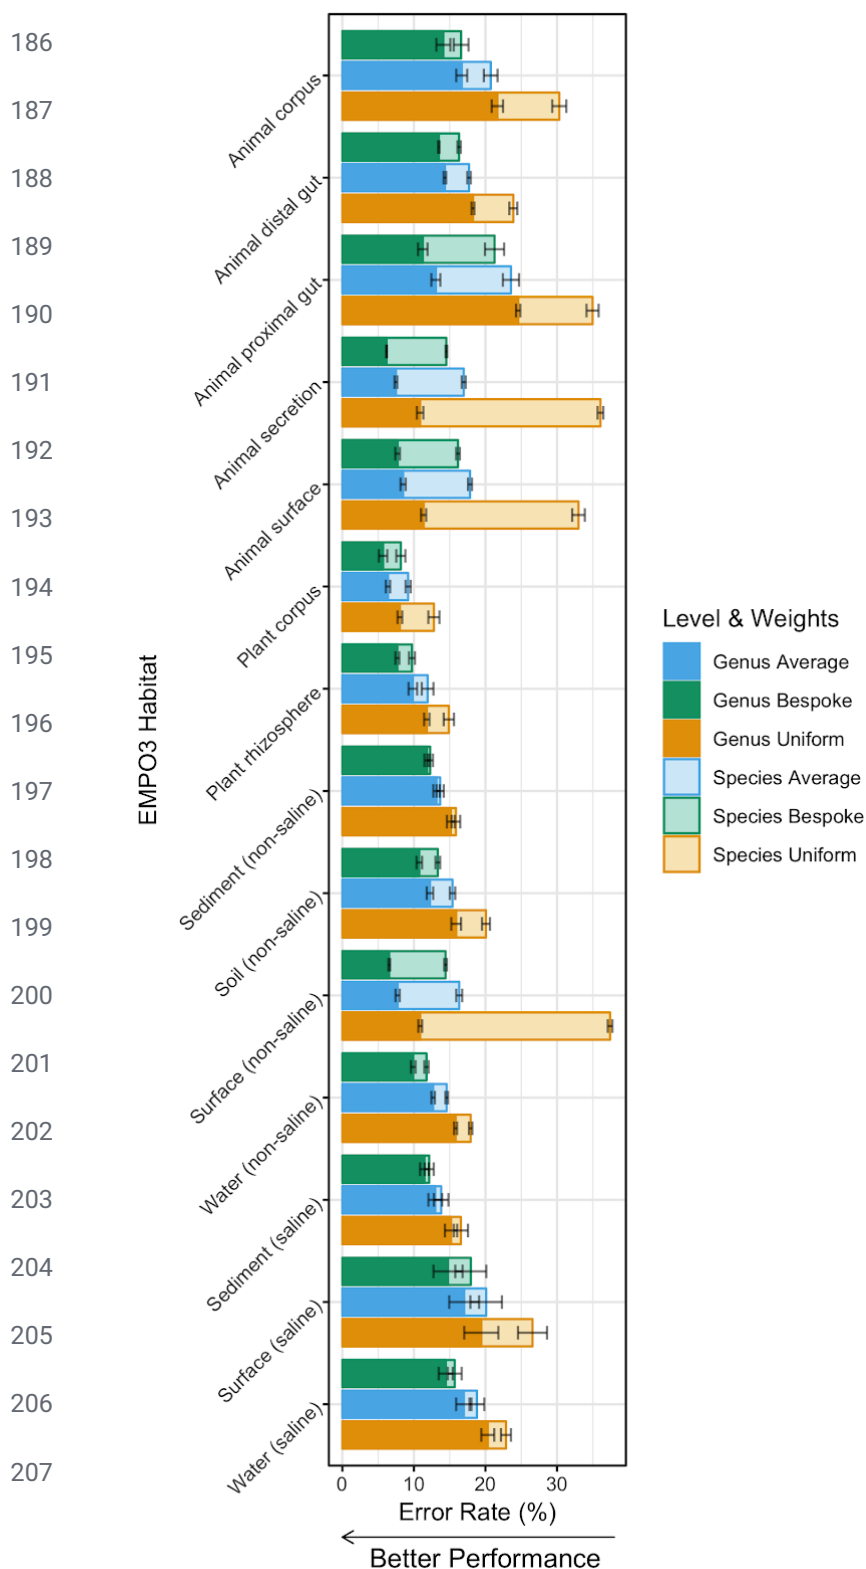

**Figure 2.** Bespoke weights outperform average weights across EMPO 3 habitat types, and average weights outperform uniform weights (sign test  $P = 6.1 \times 10^{-5}$ ). Columns show average proportion of incorrectly classified reads for differing taxonomic weighting strategies and at genus and species levels. Bespoke weights were habitat-specific. Average weights were averaged across the 14 EMPO 3 habitats. Uniform weights are the current best practice. Tests were based on 5-fold cross validation across 18,222 empirical taxonomic abundances. Error bars show standard errors across folds.

208

## Online Methods

209

### Data

210 We downloaded all public 150 nucleotide 16S v4 samples for 18 EMPO 3 habitat types from  
211 Qiita<sup>3</sup> using q2-clawback. The downloaded data consisted of sequence variant and abundance  
212 information. The sequence variants were prepared by the standard Qiita pipeline, including  
213 Deblur<sup>22</sup>, prior to download. q2-clawback uses redbiom<sup>23</sup> (<https://github.com/biocore/redbiom>) to  
214 access Qiita. Data from the following Qiita studies were used: 11113<sup>24</sup>, 11444, 1716, 10369<sup>25</sup>,  
215 990<sup>26</sup>, 2080, 1713, 894, 1289, 1883, 1673, 1288, 10353, 2192<sup>27</sup>, 10323, 678, 1773, 662, 1799,  
216 864, 1481, 1024<sup>28</sup>, 1064, 2182, 10934, 1674, 1795<sup>29</sup>, 10273, 10283<sup>30</sup>, 10422<sup>31</sup>, 804, 10308,  
217 1056<sup>32</sup>, 2382<sup>28</sup>, 1240, 889, 1041, 1717, 1222, 11149, 11669, 807<sup>33</sup>, 10245, 1711, 1721, 910,  
218 1001, 895, 550<sup>34</sup>, 1747<sup>35</sup>, 713<sup>36</sup>, 755, 861, 958<sup>37</sup>, 11161<sup>38</sup>, 11154<sup>39</sup>, 945, 723, 1715, 1714, 10798.

219 The three EMPO 1 control EMPO 3 habitat types were excluded, as well as Hypersaline  
220 (saline), Aerosol (non-saline), and Plant surface, which all had fewer than nine samples in the  
221 Qiita database for 150 nt sequence variants. The number of samples downloaded for each  
222 EMPO 3 habitat are shown in Table OM1.

223 For the cross validation analysis, sequence-variant level data was discarded and only taxonomic  
224 abundance information was retained. The sequence variants were classified using the standard  
225 q2-feature-classifier naive Bayes classifier based on Greengenes 99% identity OTU reference  
226 data<sup>40</sup> to obtain empirical taxonomic abundance data for each sample. The naive Bayes

227 classifier was trained using the “balanced” parameter recommendations given in Bokulich,  
228 Kaehler, et al.<sup>4</sup>.

229 For the shotgun data experiment (see Supplementary Results), data was downloaded from the  
230 Human Microbiome Project website<sup>2</sup>. The downloaded tables had been prepared using a  
231 pipeline leading to MetaPhlAn2<sup>41</sup>. Paired 16S stool samples were downloaded from Qiita<sup>3</sup> in the  
232 form of DNA sequencing data with quality scores. The 16S samples were trimmed to 340 nt and  
233 denoised using DADA2<sup>42</sup>. In total, 71 pairs of shotgun and 16S stool samples were found.  
234 Reference data sets were downloaded from the NCBI RefSeq database<sup>43</sup>. Full 16S sequences  
235 were trimmed to the V3-V5 regions (forward primer CCTACGGGAGGCAGCAG; reverse primer  
236 CCGTCAATTCMTTTRAGT), using q2-feature-classifier<sup>4</sup>, resulting in 20,696 reference  
237 sequences across 14,777 taxa. It should be noted that this experiment is intended for  
238 demonstration only, and that we are not advocating the use of the NCBI 16S RefSeq database  
239 for this purpose, as on average there are less than two reference sequence examples for each  
240 taxon.

## 241 Clawback

242 q2-clawback is a free, open-source, BSD-licensed package that is available on GitHub  
243 (<https://github.com/BenKaehler/q2-clawback>). It includes methods for downloading sequence  
244 variants from Qiita (fetch-Qiita-samples), extracting sequence variants for taxonomic  
245 classification using q2-feature-classifier (sequence-variants-from-samples), and assembling  
246 taxonomic weights from collections of samples of taxonomic abundance  
247 (generate-class-weights). These methods can be run independently or combined into a single

248 method call (assemble-weights-from-Qiita). Figure OM1 shows the workflow for these methods.  
249 An online tutorial is available (<https://library.qiime2.org/plugins/q2-clawback>).

250 In general, taxonomic weights are assembled as follows. A set of sequence variants with  
251 abundances are acquired (fetch-Qiita-samples). The sequence variants are extracted  
252 (sequence-variants-from-samples) and classified using the naive Bayes classifier under uniform  
253 weights using “balanced” settings<sup>4</sup>. Classification to species level is forced by setting the  
254 confidence parameter to -1. The resulting read counts are aggregated, normalised, and added  
255 to a small ( $10^{-6}$  unobserved weight default) uniform offset (generate-class-weights) to form  
256 bespoke weights. The resulting weights are used to retrain the naive Bayes classifier to create a  
257 classifier under the bespoke weights assumption. In our experiments, which are detailed below,  
258 this procedure was modified slightly to accommodate cross validation and compilation of  
259 taxonomic weights from a variety of sources.

260

## Cross Validation Using Empirical Taxonomic Abundance

261 To test classification accuracy using varying taxonomic weights, we developed a  
262 cross-validation strategy that accounted for the observed abundances of taxa in any given  
263 habitat. This strategy ensured that a classifier was never asked to classify a sequence that had  
264 occurred in its training set or generate taxonomic abundances that had directly contributed to its  
265 input taxonomic weights. To our knowledge, our cross-validation strategy is the first to  
266 incorporate information about taxonomic weights in assessing taxonomic classifier performance.  
267 This situation is known in machine learning as imbalanced learning<sup>44</sup>.

268 Cross validation was used to analyse the effectiveness of setting the taxonomic weights for the  
269 q2-feature-classifier naive Bayes taxonomic classifier. A single cross-validation test follows the  
270 pattern (shown in Figure OM2, several steps are described in more detail below):

- 271 1. Obtain a set of reference sequences and reference taxonomies.
- 272 2. Obtain a set of samples for a given EMPO 3 habitat type, where each sample contains  
273 the number of reads observed for each taxon.
- 274 3. Perform stratified k-fold cross validation simultaneously on reference sequences and  
275 samples.
- 276 4. For each fold:
  - 277 a. Train a classifier on the training reference sequences, optionally incorporating  
278 read counts from the training samples to calculate taxonomic weights.
  - 279 b. Simulate samples that closely match the taxonomic abundances in the test  
280 samples using the test reference sequences, then classify them using the above  
281 classifier.

282 **Step 2.** Data was obtained as detailed above. Taxonomic abundances were estimated using the  
283 naive Bayes classifier under uniform weights using “balanced” settings<sup>4</sup>, where the classifier  
284 was forced to classify to species level.

285 **Step 3.** We performed 5-fold cross validation in each instance. Standard stratification for 5-fold  
286 cross validation requires that at least five sequences exist for each taxonomy, which is not the  
287 case for the 99% identity Greengenes reference taxonomy. We therefore formed a stratum for  
288 each taxonomy for which five or more reference sequences existed (large taxonomies) and  
289 merged the remaining taxonomies (small taxonomies) into those strata. A single large taxonomy

290 was chosen for each small taxonomy by training a naive Bayes classifier on the large  
291 taxonomies, classifying the reference sequences in the small taxonomies, then voting weighted  
292 by confidence. Shuffled stratified 5-fold cross validation was then implemented using a standard  
293 library call to scikit-learn<sup>45</sup>.

294 Cross validation was performed simultaneously on samples and reference sequences. Sample  
295 cross validation was not stratified.

296 **Step 4a.** Each sample consisted of a set of taxonomies and their abundances. Taxonomic  
297 weights were formed by aggregating those counts across the training samples. As a result of the  
298 merged strata in Step 3, some taxonomies that were present in the bespoke weights were not  
299 present amongst the taxonomies of the training sequences. Any such taxonomy was mapped to  
300 the nearest taxonomy that was present amongst the taxonomies represented by the training  
301 sequences, as measured by the voting system from Step 3.

302 **Step 4b.** Samples were simulated by drawing sequences from the test sequences in such a way  
303 as to closely resemble the taxonomic abundances of the test samples. Again as a result of the  
304 merged strata in Step 3, some taxonomies that were present in the test samples were not  
305 present in the taxonomies of the test sequences. In the same way as for Step 4a, any missing  
306 species-level taxonomy was mapped to the closest taxonomy for a sequence present in the test  
307 sequences. Once missing taxonomies were resolved, samples were simulated by drawing test  
308 sequences as evenly as possible from each taxonomy so that any read count was a whole  
309 number.



310 For the q2-feature-classifier naive Bayes classifiers that were reported in this study, we used the  
311 recommended “balanced” parameters as recommended for uniform weights<sup>4</sup>. That is, we used a  
312 confidence level of 0.7 in all cases. In Bokulich et al.<sup>4</sup>, a confidence level of 0.92 was  
313 recommended for bespoke weights tested on mock communities. We tested the classifiers at  
314 this level but in all cases the results were dominated by the less conservative confidence level of  
315 0.7.

316 F-measure and Bray-Curtis<sup>46</sup> dissimilarity were calculated for each sample and taxonomic level  
317 using the q2-quality-control QIIME 2 plugin (<https://github.com/qiime2/q2-quality-control>).  
318 F-measure for each fold was aggregated across samples by weighting by the total read count  
319 for each sample. Bray-Curtis dissimilarity was averaged across samples without weighting, but  
320 samples with less than 1,000 reads were filtered out.

321 Error rates, or the proportion of reads not correctly classified, were calculated as follows. A  
322 classification was called correct only if the expected classification exactly matched the observed  
323 classification to the required taxonomic level. That is, if the expected classification did not  
324 contain classification all the way to that level because that species was not present in the  
325 training set, then the classification was called correct only if it was truncated at exactly the right  
326 level. Correct classification rates were again calculated for each sample and aggregated across  
327 samples by weighting by the total read count for each sample. Aggregation across folds and  
328 EMPO 3 habitats was evenly weighted.

329

## Confusion Index

330 The degree to which species can be successfully resolved is directly related to the dissimilarity  
331 of their sequences. We sought to establish a property of the reference data and taxonomic  
332 weights that was related to the classification accuracy across EMPO 3 habitats. For any pair of  
333 DNA sequences, the critical quantities are their sequence and taxonomic dissimilarities.  
334 Sequence dissimilarity is measured as the Bray-Curtis dissimilarity of k-mer counts. Taxonomic  
335 dissimilarity is the depth (from species level) of the most recent common ancestor, e.g. zero for  
336 the same species, one for species within the same genus and seven for an Archaeal versus a  
337 Bacterium.

338 The Confusion Index is then the log of the product of the probability that the sequence  
339 dissimilarity for any pair of sequences is less than a threshold (we selected 0.25) and the  
340 expectation of the taxonomic distance given that the sequence dissimilarity is less than 0.25.  
341 The expectation was calculated under the assumption that the two sequences were sampled  
342 independently with probability given by their bespoke weights. That is,

$$343 \quad CI = \log \sum_{i=1}^n \sum_{j=1}^n d_s(i,j) I(d_s(i,j) < 0.25) w(i) w(j) ,$$

344 where  $CI$  is the Confusion Index,  $d_s(i,j)$  is the sequence dissimilarity between the  $i$  th and  $j$  th  
345 sequences,  $d_t(i,j)$  is the taxonomic dissimilarity between the  $i$  th and  $j$  th sequences,  $w(i)$  is the  
346 weight of the  $i$  th sequence, and  $I(\cdot)$  is the indicator function.

347 The Confusion Index quantifies how often a pair of taxa have nearly identical sequences but  
348 different taxonomies for a given set of taxonomic weights. One advantage of this quantity is that

349 it can be estimated statistically by taking a random sample of pairs of sequences. In this study  
350 we sampled  $10^8$  pairs of sequences for each calculation.

351

## Comparison of Taxonomic Classification for Shotgun and Amplicon

### 352 Sequencing

353 The effect of using taxonomic weights derived from taxonomic classification of shotgun  
354 sequencing reads was determined using 5-fold cross validation, where each classifier was  
355 trained using taxonomic weights aggregated across the samples in the training set, then tested  
356 on 16S samples from a test set. TDR<sup>4</sup> was computed using the q2-quality-control QIIME 2  
357 plugin. TDR is the fraction of taxa that were discovered in the shotgun sequencing sample that  
358 were also found in the amplicon sample.

359

### Code Availability

360 q2-clawback is available at <https://github.com/BenKaehler/q2-clawback/releases/tag/0.0.4>. All  
361 other code developed for this study is available at  
362 <https://github.com/BenKaehler/paycheck/releases/tag/0.0.2>.

363

### Data Availability

364 The Qiita data used in this study have been deposited at  
365 <https://doi.org/10.5281/zenodo.2548899>. The HMP and NCBI data used in this study have been  
366 deposited at <https://doi.org/10.5281/zenodo.2549777>.

367

## References

- 368 22. Amir, A. *et al.* *mSystems* **2**, e00191–16 (2017).
- 369 23. McDonald, D. *et al.* 2018.
- 370 24. Schulfer, A. F. *et al.* *Nat Microbiol* **3**, 234–242 (2017).
- 371 25. Ruhe, J. *et al.* *Front Plant Sci* **7** (2016).
- 372 26. O'Brien, S. L. *et al.* *Environ Microbiol* **18**, 2039–2051 (2016).
- 373 27. Lax, S. *et al.* *Science* **345**, 1048–1052 (2014).
- 374 28. Zarraonaindia, I. *et al.* *mBio* **6** (2015).
- 375 29. Navas-Molina, J. A. *et al.* in *Methods Enzymol* 371–444 (2013).
- 376 30. Fang, X. *et al.* *Front Microbiol* **9** (2018).
- 377 31. Tripathi, A. *et al.* *mSystems* **3** (2018).
- 378 32. Delsuc, F. *et al.* *Mol Ecol* **23**, 1301–1317 (2013).
- 379 33. Gibbons, S. M. *et al.* *PLoS ONE* **9**, e97435 (2014).
- 380 34. Caporaso, J. G. *et al.* *Genome Biol* **12**, R50 (2011).
- 381 35. Hyde, E. R. *et al.* *mSystems* **1** (2016).
- 382 36. Brazelton, W. J., Nelson, B. & Schrenk, M. O. *Front Microbiol* **2** (2012).
- 383 37. Vitaglione, P. *et al.* *Am J Clin Nutr* **101**, 251–261 (2014).
- 384 38. Spirito, C. M., Marzilli, A. M. & Angenent, L. T. *Environ Sci Technol* **52**, 13438–13447
- 385 (2018).
- 386 39. Pham, V. T. H. *et al.* *Sci Rep* **7** (2017).
- 387 40. McDonald, D. *et al.* *ISME J.* **6**, 610 (2012).
- 388 41. Truong, D. T. *et al.* in *Nat. Methods* **12**, 902–903 (2015).
- 389 42. Callahan, B. J. *et al.* in *Nat. Methods* **13**, 581–583 (2016).

- 390 43. O'Leary, N. A. *et al.* en. *Nucleic Acids Res.* **44**, D733–45 (2016).
- 391 44. Lemaître, G., Nogueira, F. & Aridas, C. K. *J. Mach. Learn. Res.* **18**, 1–5 (2017).
- 392 45. Pedregosa, F *et al.* *J. Mach. Learn. Res.* **12**, 2825–2830 (2011).
- 393 46. Bray, J. R. & Curtis, J. T. *Ecol. Monogr.* **27**, 325–349 (1957).

394

## Tables

395 **Table OM1.** Sample counts for each EMPO 3 habitat type.

| EMPO 3 Habitat Type   | Number of Samples |
|-----------------------|-------------------|
| Animal corpus         | 1,158             |
| Animal distal gut     | 5,632             |
| Animal proximal gut   | 903               |
| Animal secretion      | 974               |
| Animal surface        | 1,839             |
| Plant corpus          | 543               |
| Plant rhizosphere     | 328               |
| Sediment (non-saline) | 188               |
| Surface (non-saline)  | 1,383             |
| Soil (non-saline)     | 2,802             |
| Water (non-saline)    | 4,769             |

|                   |     |
|-------------------|-----|
| Sediment (saline) | 414 |
| Surface (saline)  | 152 |
| Water (saline)    | 428 |

396

## Figures

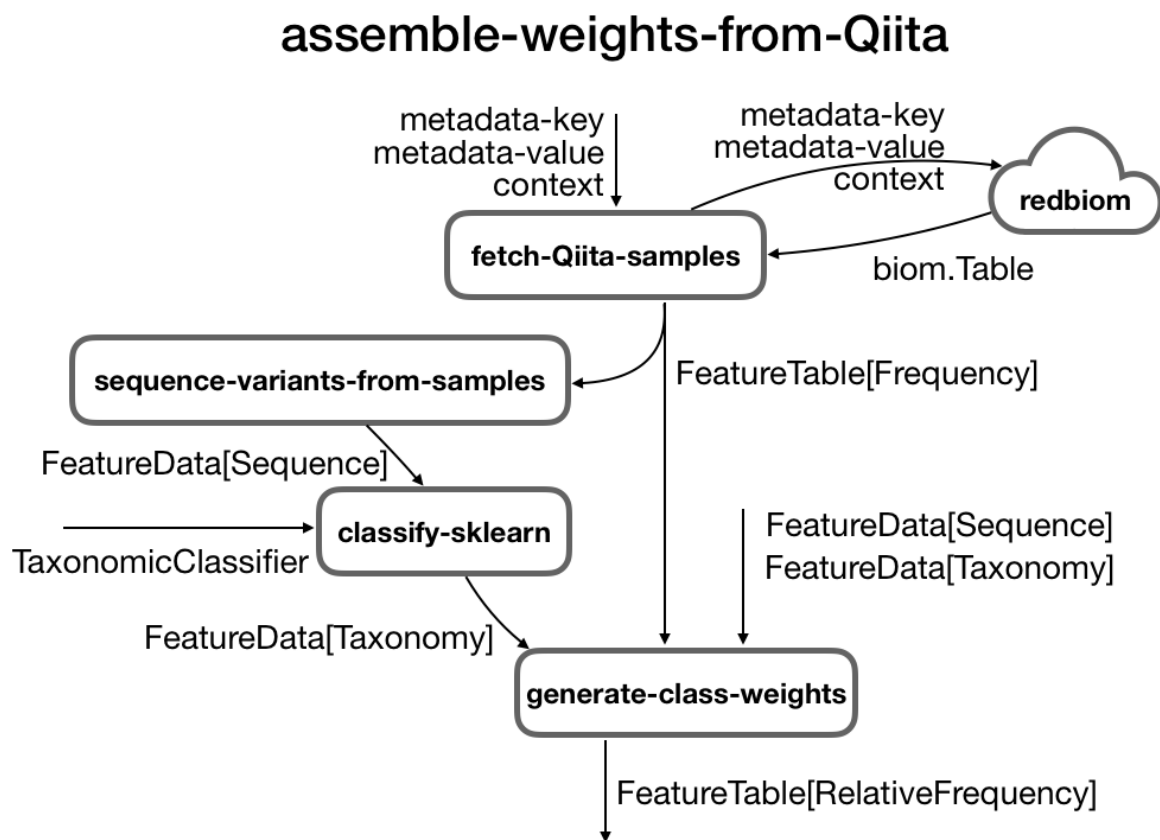

397 **Figure OM1.** Relationship between q2-clawback methods. q2-clawback contains methods for

398 downloading and assembling taxonomic weights. The assemble-weights-from-Qiita method

399 wraps the illustrated workflow, but fetch-Qiita-samples, sequence-variants-from-samples, and  
400 generate-class-weights can also be accessed directly. Labelled data flows show QIIME 2  
401 semantic types and parameters. classify-sklearn is provided by the q2-feature-classifier plugin.  
402 redbiom is a service for downloading data from Qiita.

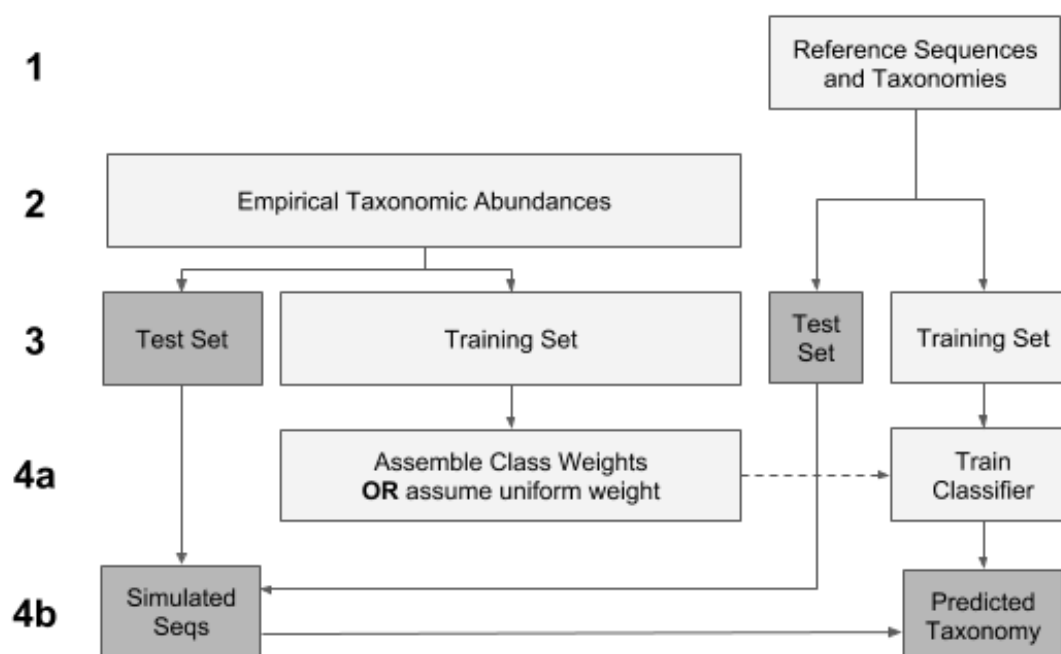

403 **Figure OM2.** Cross validation workflow. Cross validation on the reference sequences ensured  
404 that a classifier was only ever asked to classify unseen sequences. Cross validation on the  
405 empirical samples used sequences from the test set of reference sequences to simulate  
406 samples with the same taxonomic abundances as the empirical samples, and ensured that  
407 bespoke and average weights were never derived from the samples on which they were tested.

408

## Supplementary Results for: Species abundance

409

### information improves sequence taxonomy

410

### classification accuracy

411

#### Cross validation experiments

412

Using cross validation (see Online Methods), we determined the effect of several different

413

options for obtaining taxonomic weights on taxonomic classification accuracy. We labelled those

414

options as:

415

- *Uniform weights*: every taxonomic class is assumed to be equally likely.

416

- *Bespoke weights*: weights drawn from the same EMPO 3 habitat as the test samples.

417

- *Cross-habitat weights*: weights from any of the 13 EMPO 3 habitats other than a test

418

sample's source EMPO 3 habitat.

419

- *Average weights*: weights obtained by averaging across all 14 EMPO 3 habitats.

420

Uniform weights is the current default assumption for q2-feature-classifier and the only available

421

option for the RDP Classifier. Average weights were used to determine how important it is to

422

closely match the taxonomic weights with the expected weights for a given sample, and to

423

investigate a classification approach for uncharacterized and unknown sample types.

424

Cross-habitat weights were used to determine the effect of classifying reads using misspecified

425

weights. For example, if one were to take a sample that would properly be labelled as Animal



426 distal gut, but erroneously undertake taxonomic classification using a classifier trained using  
427 Plant corpus weights.

428 We used three measures of classification accuracy: error rate, Bray-Curtis dissimilarity, and  
429 F-measure, made possible because for each test sample there is a known taxonomy for each  
430 read. Please refer to the Online Methods for details of how these measures were calculated and  
431 averaged across samples.

432  
433 Classification accuracy for bespoke weights at species level meets or  
434 exceeds accuracy for uniform weights at genus level

435 As is typical for existing taxonomy classification methods, classification accuracy was excellent  
436 at class level, but decreased at finer levels of taxonomic resolution (Figure S1). Classification  
437 accuracy decreased for both bespoke and uniform weighted classifiers, but bespoke classifiers  
438 were much less prone to this effect (Figure S1). For uniform weights, the mean F-measure  
439 across 14 EMPO 3 habitat types was 0.992 (0.001 standard error), 0.88 (0.01 standard error),  
440 0.81 (0.02 standard error) at class, genus, and species levels, respectively. For bespoke  
441 weights, the mean F-measure was 0.992 (0.001 standard error), 0.92 (0.01 standard error), 0.89  
(0.01 standard error) at class, genus, and species levels, respectively.

442 A direct comparison between classification accuracy using bespoke weights versus uniform  
443 weights across the 14 EMPO 3 habitat types is given in Tables S1-3, Figure 2, and Figures S2-3  
444 for error rate, F-measure, and Bray-Curtis dissimilarity. In all cases, classification accuracy was  
445 better for bespoke weights at species level than for uniform weights at genus level for 10 of the  
446 EMPO 3 habitat types (although these 10 habitat types differ among the three measures). The

447 mean error rate (the proportion of reads incorrectly classified) across the 14 EMPO 3 habitat  
448 types was 14% (1% standard error) for bespoke weights at species level and 16% (1% standard  
449 error) for uniform weights at genus level (single-sided paired t-test  $P = 0.14$ ) (Figure 1). These  
450 results indicate that bespoke weights achieve comparable or better species-level accuracy to  
451 what uniform weights can only accomplish at genus level. The mean Bray-Curtis dissimilarity for  
452 bespoke weights at species level (0.126, 0.009 standard error) is less than that for uniform  
453 weights at genus level (0.15, 0.01 standard error), indicating greater classification accuracy, with  
454 a single-sided paired t test  $P = 0.013$ . The mean F-measure for bespoke weights at species  
455 level (0.887, 0.007 standard error) exceeds that for uniform weights at genus level (0.88, 0.01  
456 standard error) and fails to reject that they are different under a paired t test at 5% significance  
457 ( $P = 0.28$ ). These results verify our claim that on average, classification accuracy at species  
458 level for bespoke weights matches or exceeds that for uniform weights at genus level.

459

### Increasing accuracy of taxonomic weights increases prediction accuracy

460 Taxonomic classification was tested for uniform, bespoke, average, and cross-habitat taxonomic  
461 weights across 14 EMPO 3 habitat types for classification at species level. The results for  
462 uniform, bespoke, and average weights are shown for error rate, Bray-Curtis dissimilarity, and  
463 F-measure in Figures 2, S2, and S3, respectively. F-measures for cross-habitat taxonomic  
464 weights are shown in Figure S4. Cross-habitat results for error rate and Bray-Curtis dissimilarity  
465 were similar but are not shown. Note that larger F-measure is better and smaller error rate or  
466 Bray-Curtis dissimilarity is better. The total number of samples for each EMPO 3 habitat are  
467 shown in Table OM1. The results for bespoke and uniform weights are also summarised in  
468 Tables S1-3.

469 Without exception, for every EMPO 3 habitat and all measures of classification accuracy at  
470 genus and species levels, bespoke weights always outperformed average weights, and average  
471 weights always outperformed uniform weights (Table S1, Figures 2, S2-3. Across the 14 EMPO  
472 3 habitats, average Bray-Curtis dissimilarities at species level were 0.126 (0.009 standard  
473 error), 0.15 (0.01 standard error), 0.23 (0.02 standard error), for bespoke, average, and uniform  
474 weights respectively. That is an almost two-fold increase from average bespoke weights  
475 Bray-Curtis dissimilarity to that for uniform weights. The average error rates were 14.3% (0.9%  
476 standard error), 16% (1% standard error), and 25% (2% standard error), again for bespoke,  
477 average, and uniform weights at species level. The corresponding average F-measures were  
478 0.887 (0.007 standard error), 0.871 (0.008 standard error), and 0.81 (0.02 standard error). Note  
479 that the variance of the uniform weights results across the EMPO 3 habitats was always greater  
480 than for bespoke or average weights. Across the EMPO 3 types, paired t-test differences  
481 between bespoke and average weights and average and uniform weights were significant in all  
482 cases; maximum P was  $4.2 \times 10^{-4}$ . Cross-habitat weights outcomes occupied a spread but rarely  
483 outperformed average weights (8 of 182 comparisons); however, cross-habitat weights  
484 frequently outperformed uniform weights (117 out of 182 comparisons)(Figure S4). Thus, it  
485 appears that uniform weights gravely misrepresent natural species distributions, marring  
486 classification accuracy. By comparison, any type of naturally derived taxonomic weight usually  
487 improved classification accuracy, even if those weights were derived from a dissimilar habitat  
488 type.

489 Using the cross-habitat weights it was possible to quantify the relationship between  
490 classification accuracy and taxonomic weight misspecification over 182 comparisons. We first  
491 calculated the differences between error rates using cross-habitat weights and the error rates

492 using bespoke weights. We then calculated the corresponding Kullback-Leibler divergence  
493 between the bespoke and cross-habitat weights for each difference and discovered a significant  
494 correlation (Pearson  $r^2 = 0.57$ ,  $P < 2.2 \times 10^{-16}$ , see Figure S5). We performed the same test with  
495 F-measure and discovered a negative correlation of roughly the same magnitude (Pearson  $r^2 =$   
496  $0.58$ ,  $P < 2.2 \times 10^{-16}$ ). In our tests, using the bespoke weights yielded the best classification  
497 accuracy at every level, regardless of how we measured it. This result refines that finding to  
498 show that the amount by which performance degrades for taxonomic weights other than the  
499 default weights is proportional to how different they are to the bespoke weights. The implication  
500 is that any improvement of uniform weights in the direction of bespoke weights is worthwhile,  
501 and that if bespoke weights are not available, then taxonomic weights from a similar habitat or  
502 the average weights should be used for classification.

503  
504 Classification performance is largely predictable based on weights and  
505 reference data

506 We investigated what factors lead the classification accuracy for bespoke weights to vary  
507 between EMPO 3 habitats. To give an idea of the shapes of the taxonomic weights distributions,  
508 the cumulative distributions of taxonomic weights for each EMPO 3 habitat type are shown in  
509 Figure S6. The distributions are qualitatively similar, with the most abundant 500 out of 5,403  
510 species for each habitat accounting for greater than 93% of the mass in each case. While it is  
511 not shown in Figure S6, it is also worth noting that the most common taxa for each habitat type  
512 are similar: the union of the sets of taxa that account for the first 95% of weights for each habitat  
type contains only 1,571 taxa.

513 We first examined whether the diversity of an EMPO 3 habitat was related to classification  
514 accuracy under bespoke weights. Regression of error rate against the entropy of the taxonomic  
515 weights for each of the 14 EMPO 3 habitats showed no significant relationship (Pearson  $r^2 =$   
516  $0.12$ ,  $P = 0.23$ ).

517 The classification accuracy for a given EMPO 3 habitat type was instead found to be largely  
518 explained by specific interaction between taxonomic weights and the topology of the space of  
519 sequences. We discovered a significant correlation between the confusion index (see Online  
520 Methods) and the error rate using bespoke weights for each of the 14 EMPO 3 types (Pearson  
521  $r^2 = 0.72$ ,  $P = 1.3 \times 10^{-4}$ ) (Figure S7). A negative correlation of a similar magnitude was found for  
522 F-measure (Pearson  $r^2 = 0.63$ ,  $P = 7.1 \times 10^{-4}$ ). While much has been written about the difficulty of  
523 establishing species-level identity from short read marker-gene sequences<sup>4-8</sup>, to our knowledge  
524 this is the first instance of a systematic quantitative analysis of how difficult this problem is in the  
525 light of which species co-occur. By using typical weights (as estimated from the data) we have  
526 shown that while it is possible to find many examples where a taxonomic classifier can be  
527 confused at species level if presented with isolated genetic sequences and the entire reference  
528 database, that in practice the problem does not have to be that hard. More than explaining  
529 variation between habitat types, these discoveries give a clear indication of the basis for the  
530 improvements that we see when using bespoke weights.

531

### Classification performance varies by phylum

532 The error rate was tested for each of the phyla present in the observed taxa across all 14 EMPO  
533 3 habitats under the assumptions of uniform and bespoke weights. The results for the most  
534 abundant phyla (those with average abundance  $> 0.5\%$ ) are shown in Figure S8, where error

535 rate and abundance was averaged over the habitat types. We observed that reads from some  
536 phyla are significantly more difficult to classify than others. For instance, using uniform weights,  
537 the error rate was 44% (0.7% standard error) for Firmicutes but 4% (0.2% standard error) for  
538 Acidobacteria. For the two most abundant phyla, Proteobacteria and Firmicutes, the decrease in  
539 incorrect classifications from uniform to bespoke weights was substantial, from 35% (0.7%  
540 standard error) to 22% (0.4% standard error) and from 44% (0.7% standard error) to 24% (0.3%  
541 standard error), respectively (maximum t-test  $P = 8.4 \times 10^{-6}$ ). For Firmicutes that is an almost  
542 two-fold reduction in the number of incorrectly classified reads. These increases in accuracy  
543 underline the consistent increases in accuracy from uniform to bespoke weights that we have  
544 observed throughout this study.

545

### Amplicon sequencing as a proxy for shotgun metagenomics

546 Shotgun sequencing data, which has the potential to be less biased and higher-resolution than  
547 short amplicon sequences<sup>47</sup>, may provide high-accuracy taxonomic weights to further increase  
548 the value of high-throughput amplicon sequence data. To test this hypothesis, we downloaded  
549 71 stool samples from the Human Microbiome Project website<sup>2</sup> for which shotgun and  
550 marker-gene data were available. Again using cross validation and treating the shotgun  
551 sequencing taxonomic classifications as ground-truth, the taxon discovery rate (TDR)<sup>4</sup> for  
552 species-level classification of denoised 16S rRNA gene sequences improved from 0.46 (0.009  
553 standard error) to 0.54 (0.01 standard error) when using shotgun-derived taxonomic weights  
554 relative to uniform weights (paired t-test  $P = 1.4 \times 10^{-20}$ ). TDR using shotgun weights at species  
555 level also exceeded that using uniform weights at genus level (0.50, 0.009 standard error)  
556 (paired t-test  $P = 3.9 \times 10^{-5}$ ).

557 Note that this is also a verification of our findings that does not use cross validation on reference  
558 sequences or the Greengenes<sup>40</sup> reference taxonomy.

559

## References

560 47. Segata, N. *et al. Nat. Methods* **9**, 811 (2012).

561

## Supplementary Tables and Figures

562 **Table S1.** Using habitat-specific taxonomic weights, researchers can now classify sequences at  
563 species level with the same confidence that they previously classified sequences at genus level.

564 Table shows error rates at genus and species levels for habitat-specific (bespoke) and standard  
565 (uniform) taxonomic weights. Bolded rows indicate EMPO 3 habitats where species-level error  
566 rate with the bespoke classifier is less than genus-level accuracy with the uniform classifier.

567 Lower error rate indicates superior accuracy.

|                            | Error Rate (%)* |             |             |             |
|----------------------------|-----------------|-------------|-------------|-------------|
|                            | Bespoke         |             | Uniform     |             |
| EMPO 3 Habitat             | Genus           | Species     | Genus       | Species     |
| <b>Animal corpus</b>       | <b>14.1</b>     | <b>16.6</b> | <b>21.7</b> | <b>30.3</b> |
| <b>Animal distal gut</b>   | <b>13.5</b>     | <b>16.3</b> | <b>18.3</b> | <b>23.9</b> |
| <b>Animal proximal gut</b> | <b>11.2</b>     | <b>21.3</b> | <b>24.6</b> | <b>35.0</b> |

|                              |             |             |             |             |
|------------------------------|-------------|-------------|-------------|-------------|
| Animal secretion             | 6.2         | 14.5        | 10.9        | 36.1        |
| Animal surface               | 7.7         | 16.2        | 11.4        | 33.0        |
| Plant corpus                 | 5.7         | 8.2         | 8.0         | 12.8        |
| <b>Plant rhizosphere</b>     | <b>7.7</b>  | <b>9.7</b>  | <b>11.8</b> | <b>14.9</b> |
| <b>Sediment (non-saline)</b> | <b>11.8</b> | <b>12.3</b> | <b>15.2</b> | <b>15.9</b> |
| <b>Soil (non-saline)</b>     | <b>10.8</b> | <b>13.3</b> | <b>15.9</b> | <b>20.1</b> |
| Surface (non-saline)         | 6.5         | 14.4        | 10.9        | 37.4        |
| <b>Water (non-saline)</b>    | <b>9.9</b>  | <b>11.8</b> | <b>15.8</b> | <b>17.9</b> |
| <b>Sediment (saline)</b>     | <b>11.5</b> | <b>12.1</b> | <b>15.2</b> | <b>16.6</b> |
| <b>Surface (saline)</b>      | <b>14.8</b> | <b>17.9</b> | <b>19.4</b> | <b>26.6</b> |
| <b>Water (saline)</b>        | <b>14.5</b> | <b>15.7</b> | <b>20.3</b> | <b>22.9</b> |

568 \*Error rates (proportion of reads incorrectly classified) are from 5-fold cross validation where  
 569 classifiers were tested on sequences and empirical taxonomic abundances that were not used  
 570 in training. Tests were based on 21,513 empirical samples across the 14 habitat types.

571 **Table S2.** Using habitat-specific taxonomic weights, researchers can now classify sequences at  
 572 species level with the same confidence that they previously classified sequences at genus level.  
 573 Table shows Bray-Curtis dissimilarity at genus and species levels for habitat-specific (bespoke)  
 574 and standard (uniform) taxonomic weights. Bolded rows indicate EMPO 3 habitats where



575 species-level Bray-Curtis dissimilarity with the bespoke classifier is less than genus-level

576 accuracy with the uniform classifier. Lower Bray-Curtis dissimilarity indicates superior accuracy.

| b                            | Bray-Curtis Dissimilarity* |             |             |             |
|------------------------------|----------------------------|-------------|-------------|-------------|
|                              | Bespoke                    |             | Uniform     |             |
| EMPO 3 Habitat               | Genus                      | Species     | Genus       | Species     |
| <b>Animal corpus</b>         | <b>0.13</b>                | <b>0.15</b> | <b>0.21</b> | <b>0.29</b> |
| <b>Animal distal gut</b>     | <b>0.11</b>                | <b>0.13</b> | <b>0.16</b> | <b>0.21</b> |
| <b>Animal proximal gut</b>   | <b>0.10</b>                | <b>0.20</b> | <b>0.24</b> | <b>0.34</b> |
| Animal secretion             | 0.05                       | 0.13        | 0.10        | 0.35        |
| Animal surface               | 0.07                       | 0.14        | 0.11        | 0.32        |
| <b>Plant corpus</b>          | <b>0.06</b>                | <b>0.08</b> | <b>0.08</b> | <b>0.13</b> |
| <b>Plant rhizosphere</b>     | <b>0.06</b>                | <b>0.08</b> | <b>0.11</b> | <b>0.14</b> |
| <b>Sediment (non-saline)</b> | <b>0.09</b>                | <b>0.10</b> | <b>0.13</b> | <b>0.14</b> |
| <b>Soil (non-saline)</b>     | <b>0.09</b>                | <b>0.11</b> | <b>0.15</b> | <b>0.19</b> |
| Surface (non-saline)         | 0.06                       | 0.13        | 0.10        | 0.36        |
| <b>Water (non-saline)</b>    | <b>0.09</b>                | <b>0.11</b> | <b>0.15</b> | <b>0.17</b> |
| <b>Sediment (saline)</b>     | <b>0.09</b>                | <b>0.10</b> | <b>0.13</b> | <b>0.15</b> |

|                         |             |             |             |             |
|-------------------------|-------------|-------------|-------------|-------------|
| <b>Surface (saline)</b> | <b>0.13</b> | <b>0.16</b> | <b>0.18</b> | <b>0.25</b> |
| <b>Water (saline)</b>   | <b>0.13</b> | <b>0.14</b> | <b>0.19</b> | <b>0.22</b> |

577 \*Bray-Curtis dissimilarities are from 5-fold cross validation where classifiers were tested on  
 578 sequences and empirical taxonomic abundances that were not used in training. Tests were  
 579 based on 18,222 empirical samples across the 14 habitat types.

580 **Table S3.** Using habitat-specific taxonomic weights, researchers can now classify sequences at  
 581 species level with the same confidence that they previously classified sequences at genus level.  
 582 Table shows F-measure at genus and species levels for habitat-specific (bespoke) and standard  
 583 (uniform) taxonomic weights. Bolded rows indicate EMPO 3 habitats where species-level  
 584 F-measure with the bespoke classifier is greater than genus-level accuracy with the uniform  
 585 classifier. Greater F-measure indicates superior accuracy.

| c                          | F-measure*  |             |             |             |
|----------------------------|-------------|-------------|-------------|-------------|
|                            | Bespoke     |             | Uniform     |             |
|                            | Genus       | Species     | Genus       | Species     |
| EMPO 3 Habitat             |             |             |             |             |
| <b>Animal corpus</b>       | <b>0.89</b> | <b>0.87</b> | <b>0.83</b> | <b>0.76</b> |
| <b>Animal distal gut</b>   | <b>0.89</b> | <b>0.87</b> | <b>0.85</b> | <b>0.81</b> |
| <b>Animal proximal gut</b> | <b>0.91</b> | <b>0.83</b> | <b>0.81</b> | <b>0.72</b> |
| Animal secretion           | 0.95        | 0.89        | 0.92        | 0.73        |
| Animal surface             | 0.94        | 0.88        | 0.92        | 0.76        |

|                              |             |             |             |             |
|------------------------------|-------------|-------------|-------------|-------------|
| Plant corpus                 | 0.95        | 0.93        | 0.94        | 0.90        |
| <b>Plant rhizosphere</b>     | <b>0.94</b> | <b>0.92</b> | <b>0.91</b> | <b>0.89</b> |
| <b>Sediment (non-saline)</b> | <b>0.91</b> | <b>0.90</b> | <b>0.88</b> | <b>0.87</b> |
| <b>Soil (non-saline)</b>     | <b>0.92</b> | <b>0.90</b> | <b>0.88</b> | <b>0.85</b> |
| Surface (non-saline)         | 0.95        | 0.89        | 0.92        | 0.73        |
| <b>Water (non-saline)</b>    | <b>0.93</b> | <b>0.91</b> | <b>0.88</b> | <b>0.86</b> |
| <b>Sediment (saline)</b>     | <b>0.91</b> | <b>0.90</b> | <b>0.88</b> | <b>0.87</b> |
| <b>Surface (saline)</b>      | <b>0.89</b> | <b>0.85</b> | <b>0.85</b> | <b>0.79</b> |
| <b>Water (saline)</b>        | <b>0.89</b> | <b>0.87</b> | <b>0.84</b> | <b>0.81</b> |

586 \*F-measures are for 5-fold cross validation where classifiers were tested on sequences and  
587 empirical taxonomic abundances that were not used in training. Tests were based on 21,513  
588 empirical samples across the 14 habitat types.

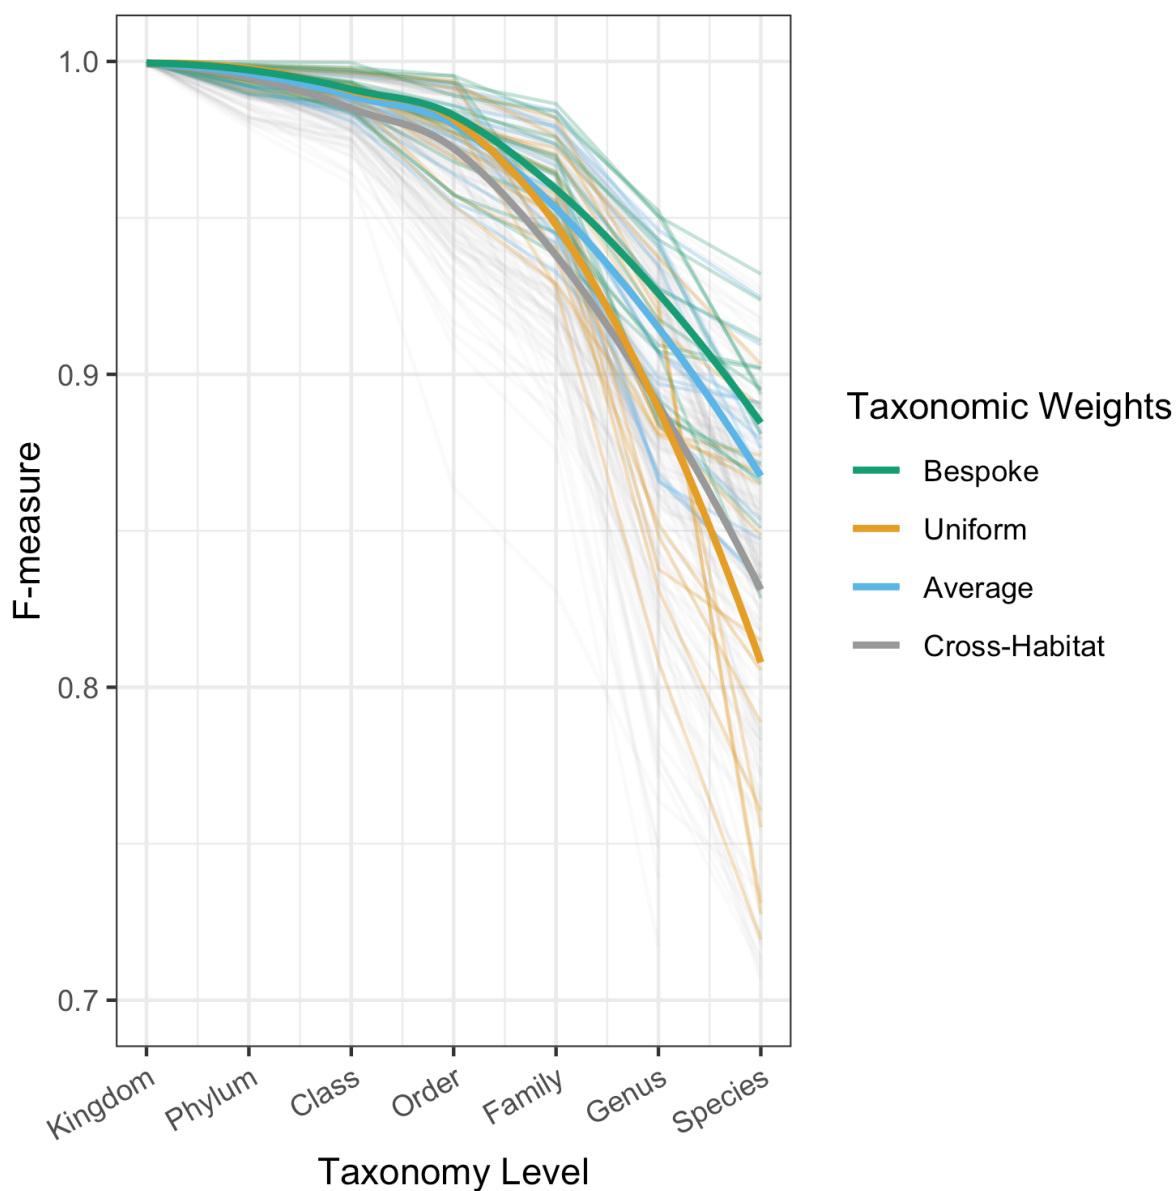

589 **Figure S1.** Classification accuracy drops with increasing taxonomic specificity. F-measures are  
590 for 5-fold cross validation where classifiers trained using a variety of taxonomic weighting  
591 strategies are tested on sequences and empirical taxonomic abundances that were not used in  
592 training. Classification F-measure drops as finer levels of classification are required, but is much  
593 more consistent across levels for classifiers with bespoke (habitat-specific) weights. Bespoke  
594 weights were habitat-specific. Average weights were averaged across the 14 EMPO 3 habitats.

595 Uniform weights are the current best practice. Cross-habitat weights were weights from EMPO 3  
596 habitats other than the sample's habitat. Faint lines show results for 14 EMPO 3 habitat types.  
597 Bold lines show LOESS plots to demonstrate trends.

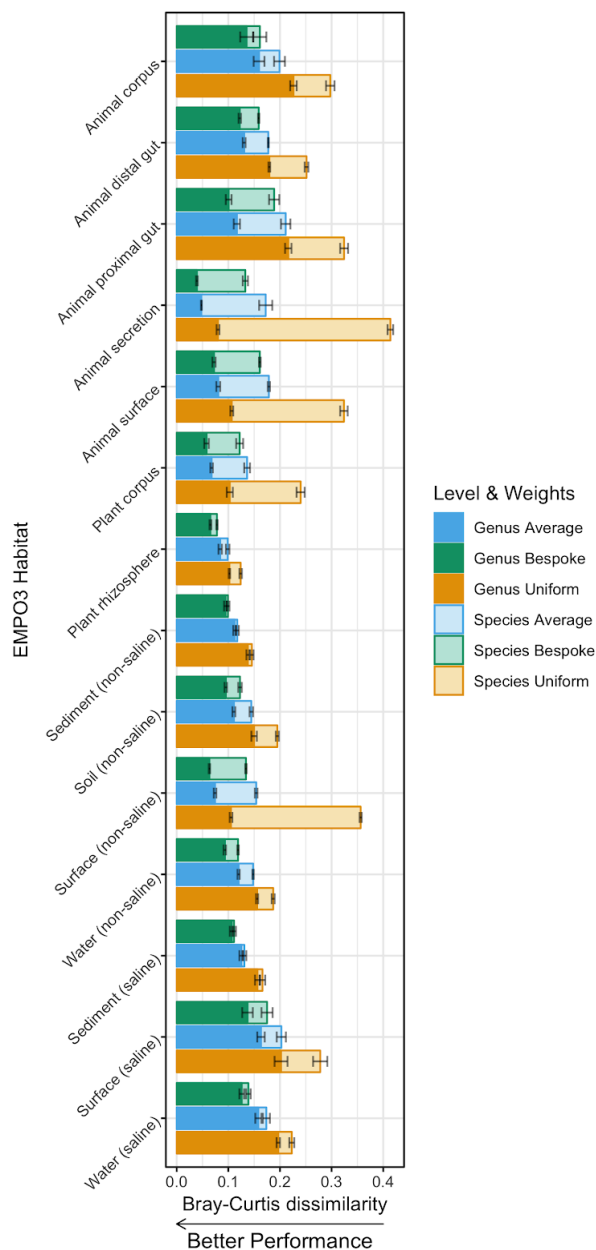

598 **Figure S2.** Bespoke weights always outperformed average weights across EMPO 3 habitat  
599 types, and average weights always outperformed uniform weights (sign test  $P = 6.1 \times 10^{-5}$ ).

600 Columns show average Bray-Curtis dissimilarity between expected and observed taxonomic  
601 abundances for differing taxonomic weighting strategies and at genus and species levels.  
602 Bespoke weights were habitat-specific. Average weights were averaged across the 14 EMPO 3  
603 habitats. Uniform weights are the current best practice. Tests were based on 5-fold cross  
604 validation across 18,222 empirical taxonomic abundances. Error bars show standard errors  
605 across folds.

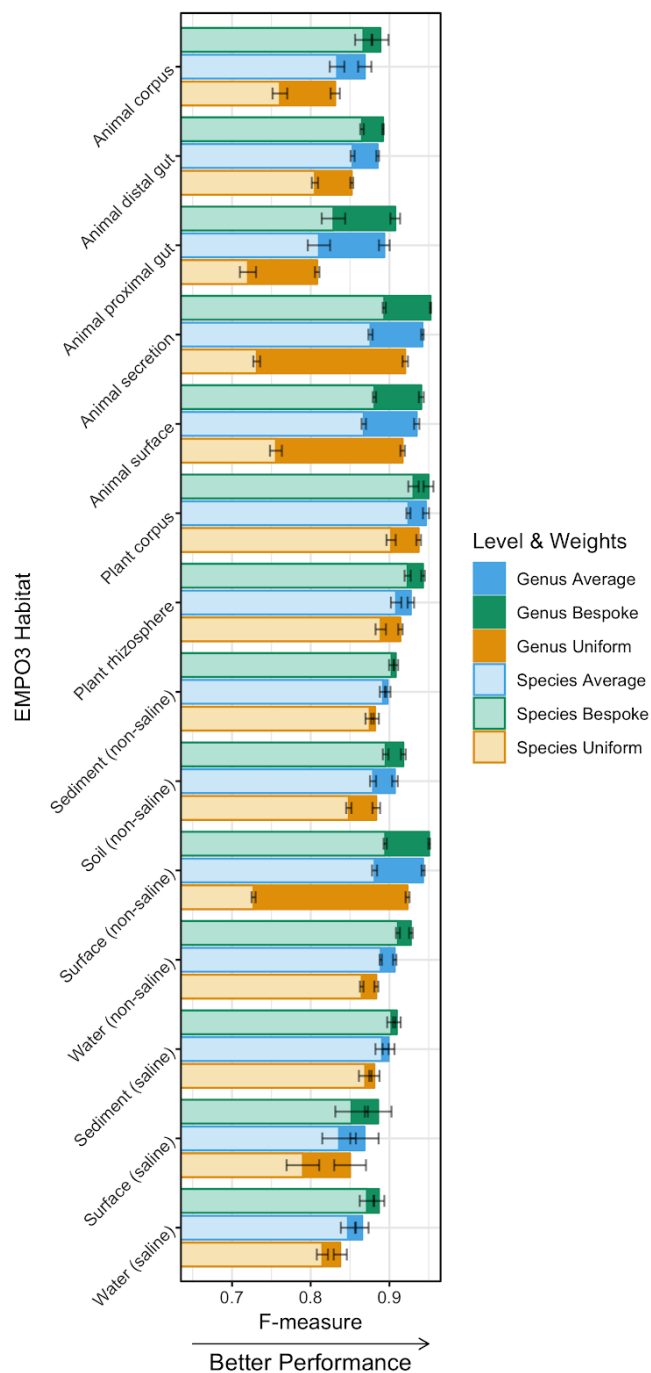

606 **Figure S3.** Bespoke weights always outperformed average weights across EMPO 3 habitat  
607 types, and average weights always outperformed uniform weights (sign test  $P = 6.1 \times 10^{-5}$ ).  
608 F-measures are from 5-fold cross validation where classifiers trained using a variety of

609 taxonomic weighting strategies are tested on sequences and empirical taxonomic abundances  
 610 that were not used in training. Tests were based on 21,513 empirical samples across the 14  
 611 habitat types. Error bars show standard errors across folds.

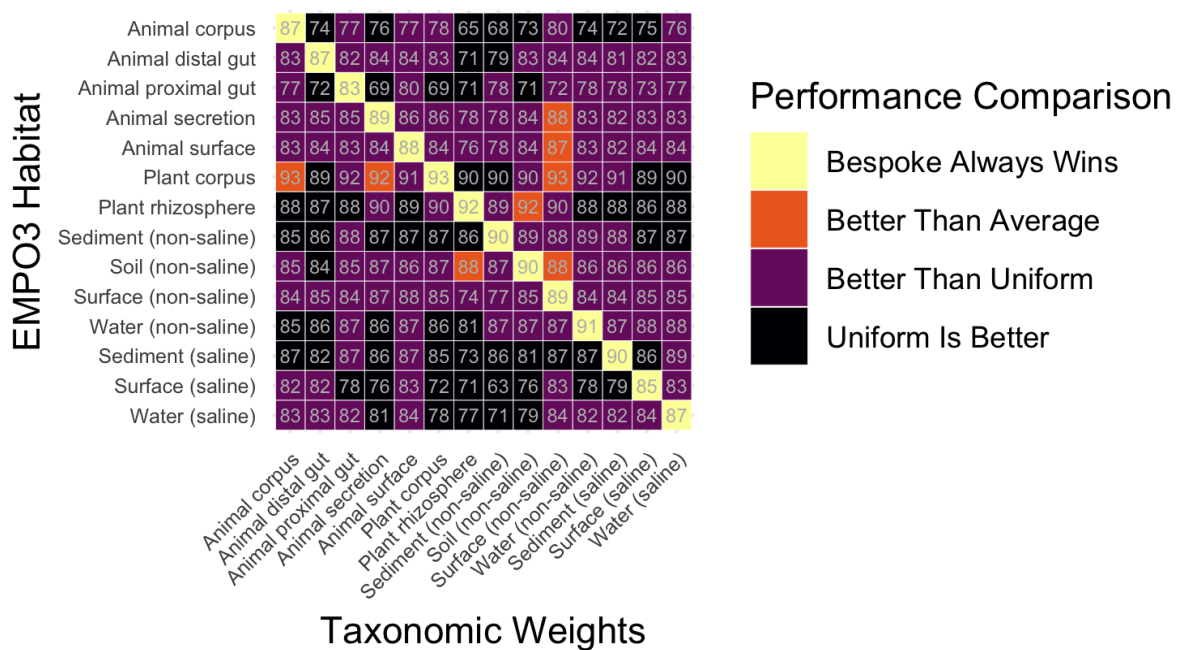

612 **Figure S4. Summary of the effect of using cross-habitat weights (taxonomic weights**  
 613 **different to the sample habitat).** Light grey numbers show F-measure as a percentage.  
 614 Bespoke weights (when taxonomic weights match sample habitat) are always superior.  
 615 Occasionally (8 times) weights other than bespoke weights beat the weights that were averaged  
 616 across the 14 EMPO 3 habitats. Frequently the cross-habitat weights were better than uniform



617 weights (which is current best practice, 109 times). Occasionally the uniform weights  
618 outperformed the cross-habitat weights (65 times).

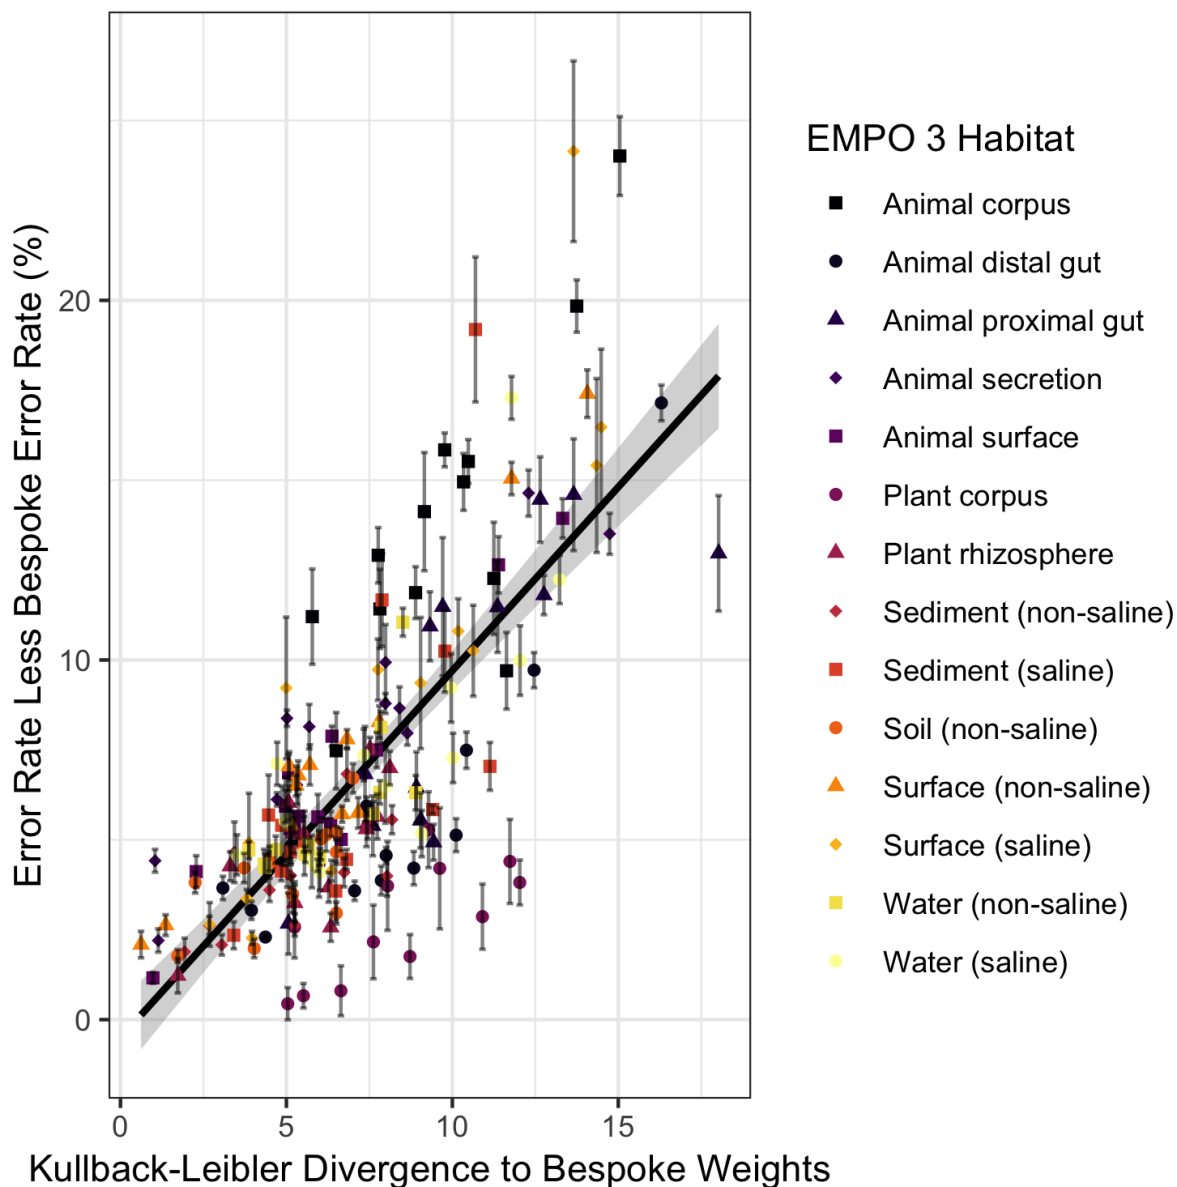

619 **Figure S5.** Classification accuracy degrades as taxonomic weights diverge from sample  
620 abundances. Cross testing of classification accuracy by setting taxonomic weights to those from  
621 each of the 13 EMPO 3 habitats other than the appropriate bespoke weights, across 14 EMPO  
622 3 habitats. There is a clear association (Pearson  $r^2 = 0.57$ ,  $P < 2.2 \times 10^{-16}$ ).

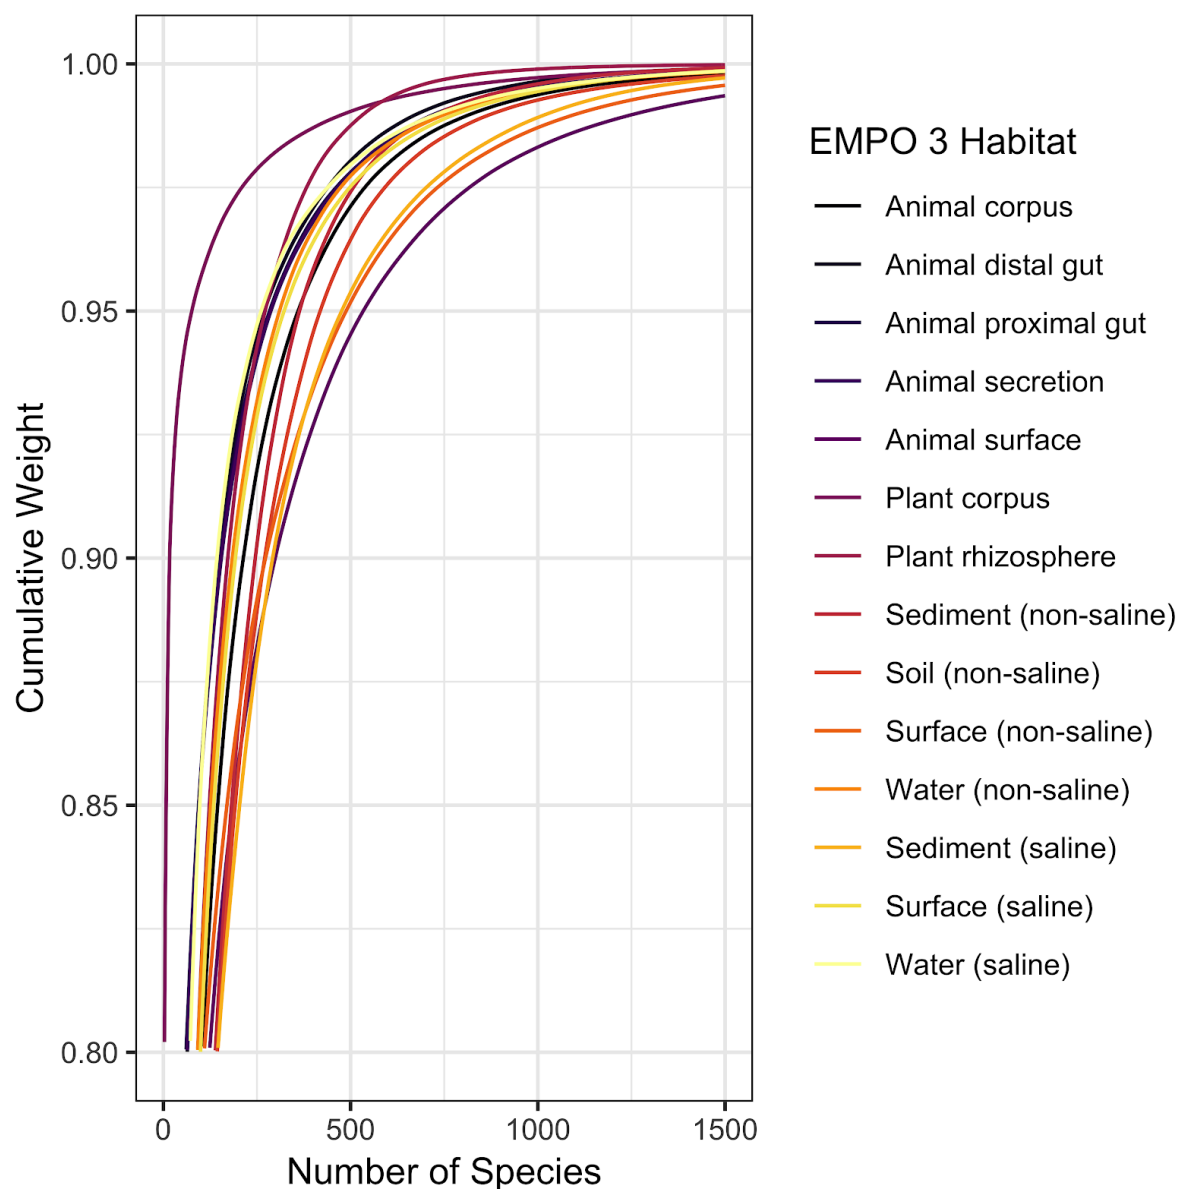

623 **Figure S6.** Cumulative weights for different habitat types display similar diversity trends. Lines  
624 show the cumulative taxonomic weights for 14 EMPO 3 habitat types as a function of species  
625 count, coloured by habitat. Taxa are ordered separately for each habitat from most to least  
626 abundant. The most peaked distribution is Plant corpus, where 73% of reads were mapped to a  
627 single taxonomy in the Cyanobacteria phylum, Chloroplast class.

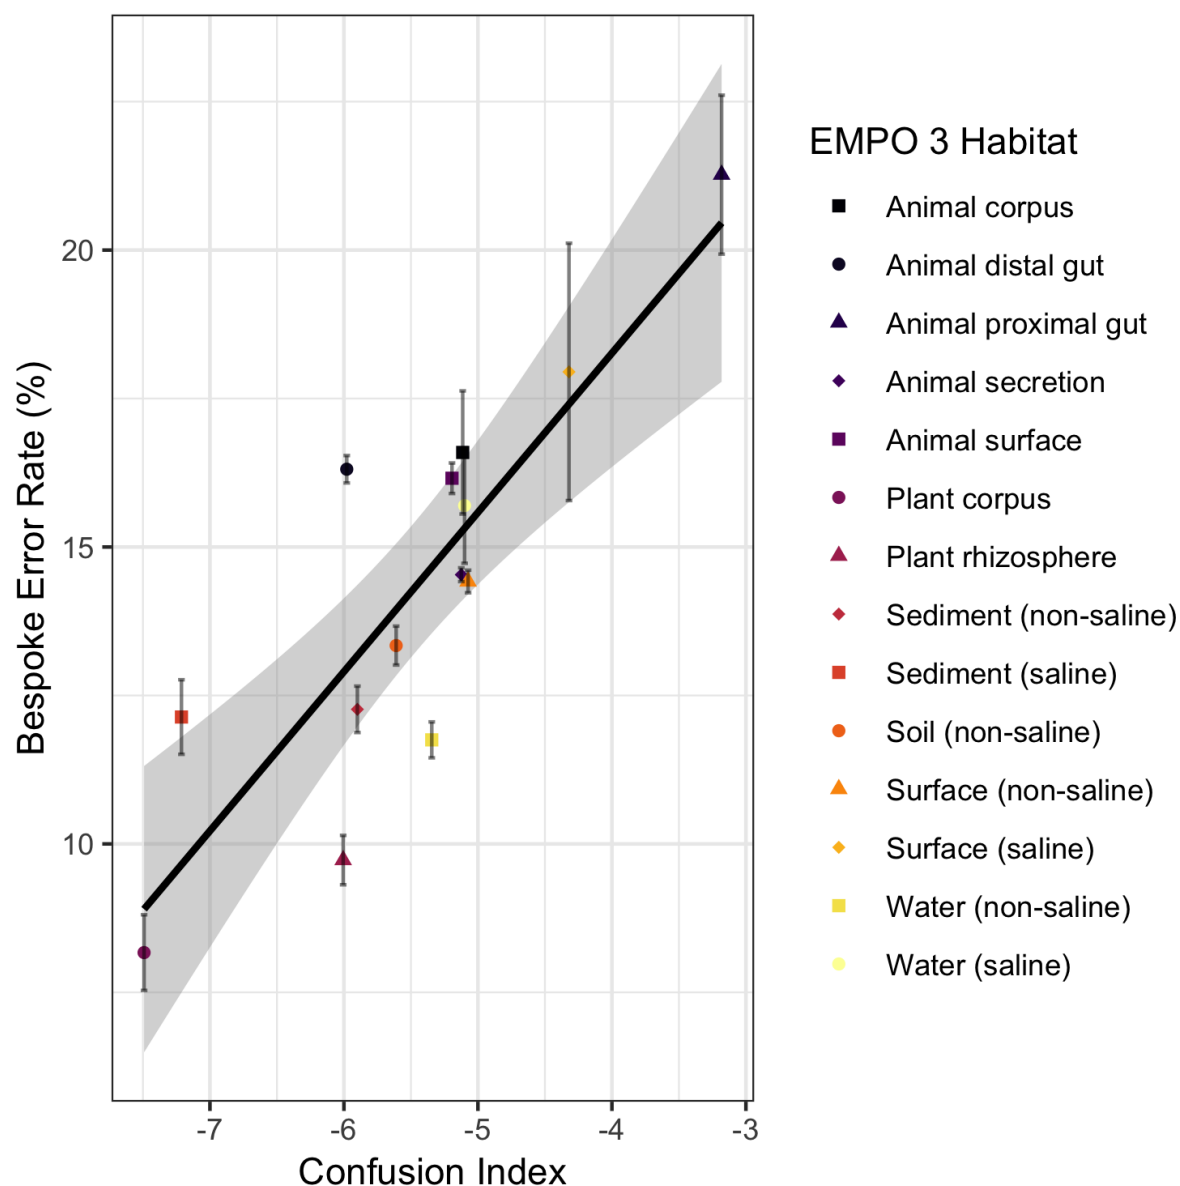

628 **Figure S7.** Classification accuracy when using the appropriate bespoke weights is largely  
629 explained by how often sequences from different from species are confused (Pearson  $r^2 = 0.72$ ,  
630  $P = 1.3 \times 10^{-4}$ ). The confusion index is the log of the expected level of taxonomic difference  
631 between two similar reference sequences weighted by the likelihood of observing similar  
632 sequences. All points calculated using 5-fold cross validation. Error bars are standard errors  
633 across folds. Regression confidence intervals are 95%.

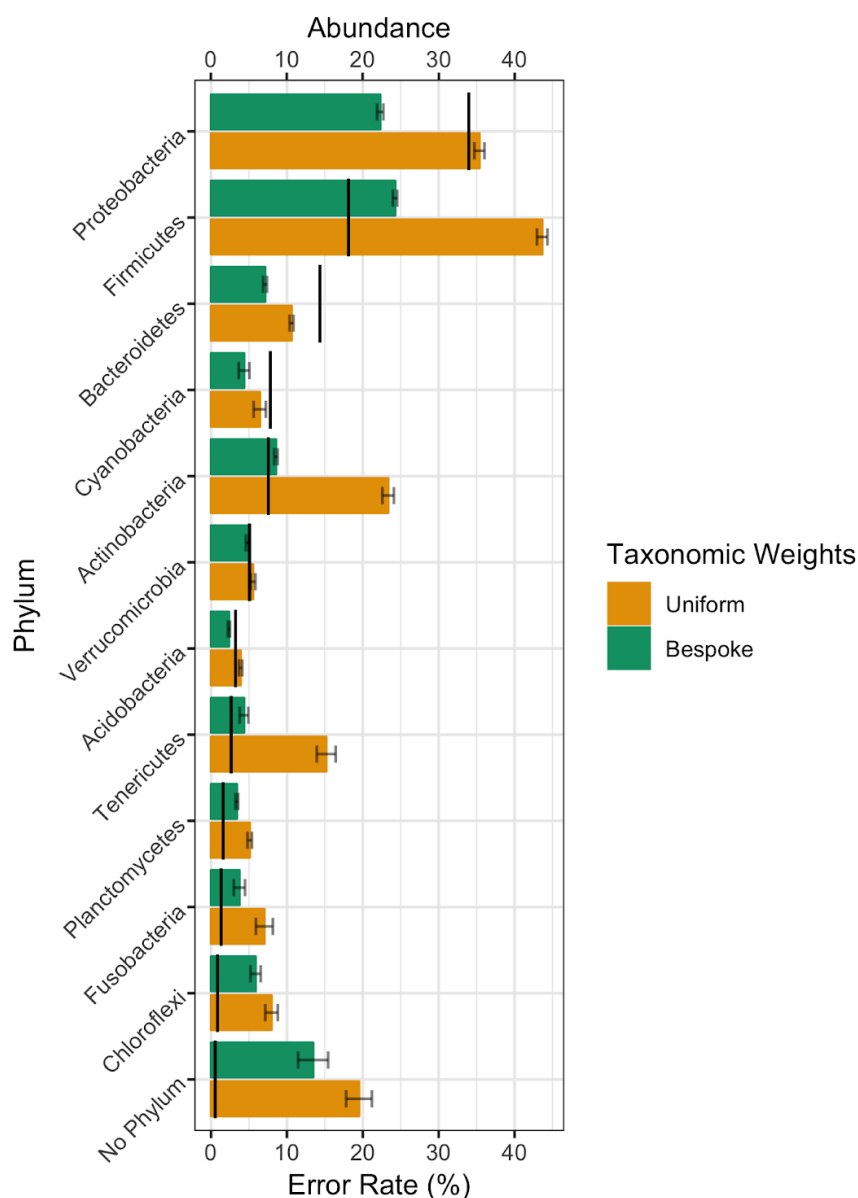

634 **Figure S8.** Habitat-specific taxonomic weights improve species-level classification  
635 across phyla. The use of habitat-specific weights is more important for species classification  
636 within some phyla, but is more important for more abundant phyla. Columns show percentage of

637 reads correctly classified averaged across 14 EMPO 3 habitats and 21,513 empirical samples.  
638 Black lines show average abundances for each phylum. The phyla were truncated to only show  
639 those with an average abundance of > 0.05%. Error bars show standard error.

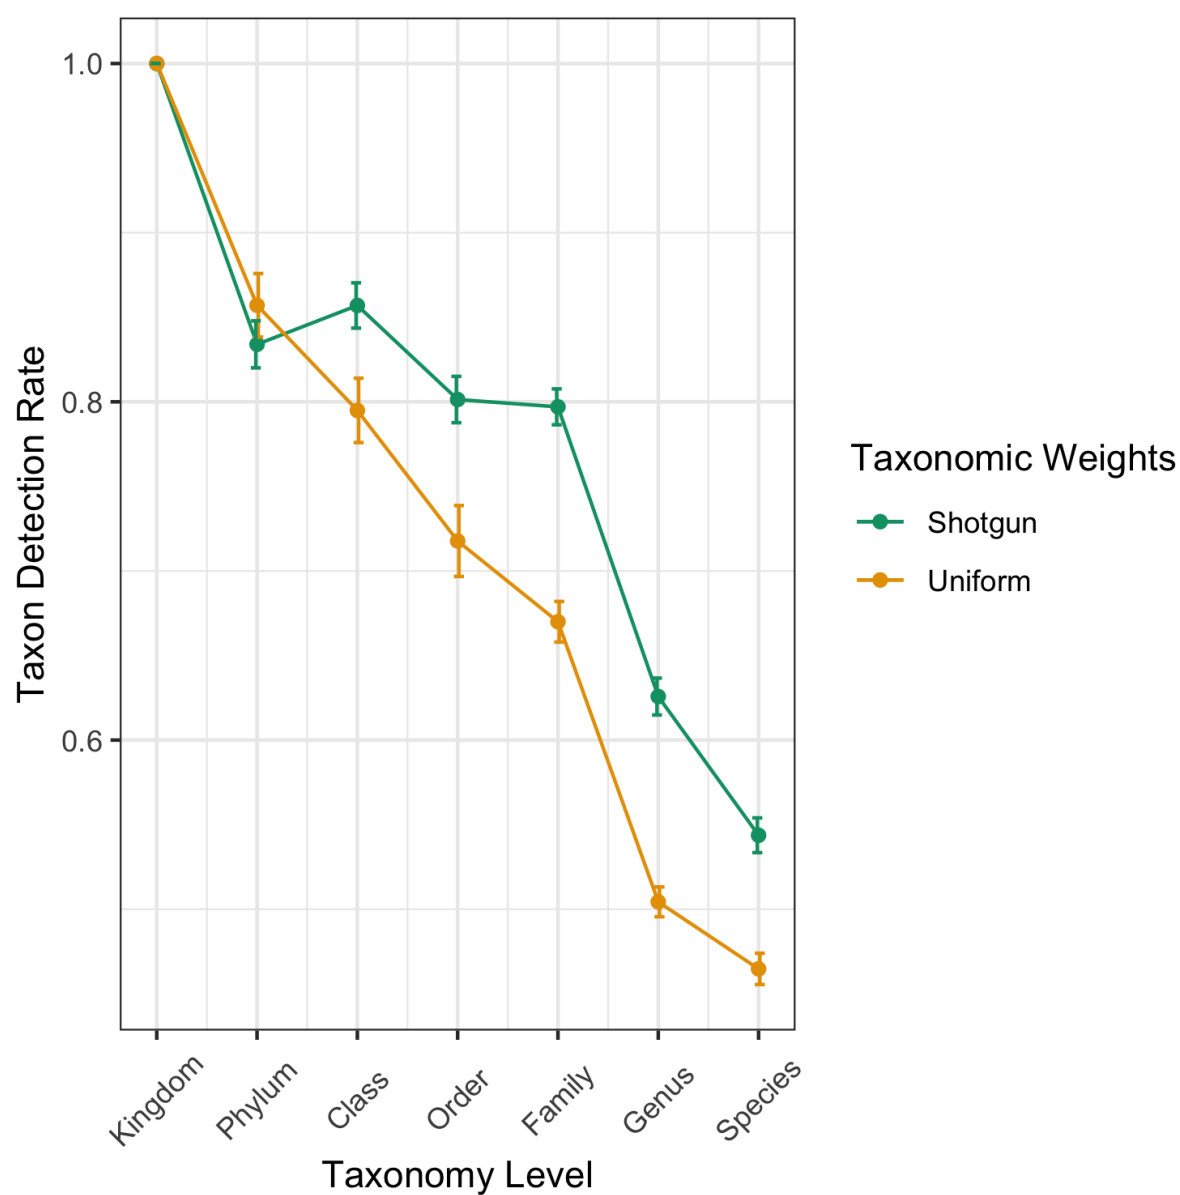

640 **Figure S9.** Taxonomic weights from shotgun sequencing improve agreement between amplicon  
641 and shotgun sequencing taxonomic compositions. Taxonomic weights derived from shotgun  
642 sequencing experiments make the taxa discovered in out-of-sample 16S sequencing samples  
643 agree more closely with shotgun sequencing experiments on the same samples. Taxon  
644 discovery rate (TDR) is the fraction of taxa detected using shotgun sequencing that were also  
645 found using 16S sequencing. Points show mean TDR across 71 stool samples for which paired  
646 16S and shotgun sequencing exists. Error bars show standard errors across folds for 5-fold  
647 cross validation.
